# Supplementary material
Source: ML conference proceedings conference paper supplement (https://proceedings.neurips.cc/paper_files/paper/2013/hash/a5cdd4aa0048b187f7182f1b9ce7a6a7-Abstract.html)
Supplement: Supplementary file [file a5cdd4aa0048b187f7182f1b9ce7a6a7-Supplemental.zip]

---

# Convex Calibrated Surrogates for Low-Rank Loss Matrices with Applications to Subset Ranking Losses

---

## Appendix

### Proof of Theorem 4

*Proof.* Let  $\mathbf{p} \in \mathcal{P}_{\text{reinforce}}$ . We define  $\mathbf{u}^{\mathbf{p}} \in \mathbb{R}^{r(r+1)/2}$  again here for convenience:

$$u_{ij}^{\mathbf{p}} = \mathbf{E}_{Y \sim \mathbf{p}} \left[ \frac{Y_i Y_j}{\sum_{\gamma=1}^r Y_\gamma} \right] = \sum_{\mathbf{y} \in \mathcal{Y}} p_{\mathbf{y}} \left( \frac{y_i y_j}{\sum_{\gamma=1}^r y_\gamma} \right) \quad \forall i, j \in [r] : i \geq j.$$

It is easy to see that  $\mathbf{u}^{\mathbf{p}} \in \mathbb{R}^{r(r+1)/2}$  is the unique minimizer of  $\mathbf{p}^\top \boldsymbol{\psi}_{\text{MAP}}^*(\mathbf{u})$  over  $\mathbf{u} \in \mathbb{R}^{r(r+1)/2}$ .

Recall also that while  $u_{ij}^{\mathbf{p}}$  above is defined only for  $i \geq j$ , we also set  $u_{ij}^{\mathbf{p}} = u_{ji}^{\mathbf{p}}$  for  $i < j$ .

For brevity, we will write  $\ell_{\text{MAP}}$  as  $\ell$  below. We have from the definition of the MAP loss,

$$\begin{aligned} \mathbf{p}^\top \boldsymbol{\ell}_\sigma &= 1 - \sum_{i=1}^r \sum_{j=1}^i u_{ij}^{\mathbf{p}} \frac{1}{\max(\sigma(i), \sigma(j))} \\ &= 1 - \sum_{i=1}^r \frac{1}{i} \sum_{j=1}^i u_{\sigma^{-1}(i)\sigma^{-1}(j)}^{\mathbf{p}}. \end{aligned} \tag{2}$$

Now define the following sets:

$$\begin{aligned} \Pi^*(\mathbf{p}) &= \operatorname{argmin}_{\sigma \in S_r} \mathbf{p}^\top \boldsymbol{\ell}_\sigma \\ \Pi(\mathbf{p}) &= \left\{ \sigma \in S_r : u_{ii}^{\mathbf{p}} > u_{jj}^{\mathbf{p}} \implies \sigma(i) < \sigma(j) \right\}. \end{aligned}$$

From Lemma 8 below, we have that  $\Pi(\mathbf{p}) \subseteq \Pi^*(\mathbf{p})$ .

By the definition of  $\overline{\text{pred}}_{\text{MAP}}$  and  $\Pi(\mathbf{p})$ , we also have that  $\exists \epsilon > 0$  such that for any  $\mathbf{u} \in \mathbb{R}^{r(r+1)/2}$ ,

$$\|\mathbf{u} - \mathbf{u}^{\mathbf{p}}\| < \epsilon \implies \overline{\text{pred}}_{\text{MAP}}(\mathbf{u}) \in \Pi(\mathbf{p}).$$

Thus, we have

$$\begin{aligned} \inf_{\mathbf{u} \in \mathbb{R}^{r(r+1)/2} : \overline{\text{pred}}_{\text{MAP}}(\mathbf{u}) \notin \operatorname{argmin}_{\sigma} \mathbf{p}^\top \boldsymbol{\ell}_\sigma} \mathbf{p}^\top \boldsymbol{\psi}_{\text{MAP}}^*(\mathbf{u}) &= \inf_{\mathbf{u} \in \mathbb{R}^{r(r+1)/2} : \overline{\text{pred}}_{\text{MAP}}(\mathbf{u}) \notin \Pi^*(\mathbf{p})} \mathbf{p}^\top \boldsymbol{\psi}_{\text{MAP}}^*(\mathbf{u}) \\ &\geq \inf_{\mathbf{u} \in \mathbb{R}^{r(r+1)/2} : \overline{\text{pred}}_{\text{MAP}}(\mathbf{u}) \notin \Pi(\mathbf{p})} \mathbf{p}^\top \boldsymbol{\psi}_{\text{MAP}}^*(\mathbf{u}) \\ &\geq \inf_{\mathbf{u} \in \mathbb{R}^{r(r+1)/2} : \|\mathbf{u} - \mathbf{u}^{\mathbf{p}}\| \geq \epsilon} \mathbf{p}^\top \boldsymbol{\psi}_{\text{MAP}}^*(\mathbf{u}) \\ &> \inf_{\mathbf{u} \in \mathbb{R}^{r(r+1)/2}} \mathbf{p}^\top \boldsymbol{\psi}_{\text{MAP}}^*(\mathbf{u}), \end{aligned}$$

where the last inequality follows since  $\mathbf{p}^\top \boldsymbol{\psi}_{\text{MAP}}^*(\mathbf{u})$  is a strictly convex function of  $\mathbf{u}$  and  $\mathbf{u}^{\mathbf{p}}$  is its unique minimizer.

Since the above holds for all  $\mathbf{p} \in \mathcal{P}_{\text{reinforce}}$ , we have that  $(\boldsymbol{\psi}_{\text{MAP}}^*, \overline{\text{pred}}_{\text{MAP}})$  is  $(\ell_{\text{MAP}}, \mathcal{P}_{\text{reinforce}})$ -calibrated.  $\square$

The proof of Theorem 4 makes use of the following technical lemma:

**Lemma 8.** Let  $\mathbf{p} \in \mathcal{P}_{\text{reinforce}}$ . Let the sets  $\Pi^*(\mathbf{p})$  and  $\Pi(\mathbf{p})$  be defined as in the proof of Theorem 4 above. Then  $\Pi(\mathbf{p}) \subseteq \Pi^*(\mathbf{p})$ .

*Proof of Lemma 8.* As in the proof of Theorem 4, for brevity, we will write  $\ell_{\text{MAP}}$  as  $\ell$  below.

We first observe that all permutations  $\sigma \in \Pi(\mathbf{p})$  have the same value of  $\mathbf{p}^\top \ell_\sigma$ . To see this, note that permutations in  $\Pi(\mathbf{p})$  differ only in positions they assign to elements  $i, j \in [r]$  with  $u_{ii}^\mathbf{p} = u_{jj}^\mathbf{p}$ . But since  $\mathbf{p} \in \mathcal{P}_{\text{reinforce}}$ , we have that if  $u_{ii}^\mathbf{p} = u_{jj}^\mathbf{p}$ , then  $u_{i\gamma}^\mathbf{p} = u_{j\gamma}^\mathbf{p}$  for all  $\gamma \in [r] \setminus \{i, j\}$ . Thus, from the form of  $\mathbf{p}^\top \ell_\sigma$ , we can see that if  $u_{ii}^\mathbf{p} = u_{jj}^\mathbf{p}$ , then interchanging the positions of  $i$  and  $j$  in a permutation  $\sigma$  does not change the value of  $\mathbf{p}^\top \ell_\sigma$ . This establishes that all permutations  $\sigma \in \Pi(\mathbf{p})$  have the same value of  $\mathbf{p}^\top \ell_\sigma$ .

We will show below that  $\exists$  a permutation  $\sigma^* \in \Pi(\mathbf{p}) \cap \Pi^*(\mathbf{p})$ . This will give that  $\sigma^* \in \Pi(\mathbf{p})$  and  $\mathbf{p}^\top \ell_{\sigma^*} = \arg\min_{\sigma} \mathbf{p}^\top \ell_\sigma$ ; by the above observation, we will then have that  $\mathbf{p}^\top \ell_{\sigma'} = \arg\min_{\sigma} \mathbf{p}^\top \ell_\sigma$  for all  $\sigma' \in \Pi(\mathbf{p})$ , i.e. that  $\Pi(\mathbf{p}) \subseteq \Pi^*(\mathbf{p})$ .

In order to show the existence of a permutation  $\sigma^* \in \Pi(\mathbf{p}) \cap \Pi^*(\mathbf{p})$ , we will start with an arbitrary element  $\sigma^0 \in \Pi^*(\mathbf{p})$ , and will construct a sequence of permutations  $\sigma^1, \sigma^2, \dots, \sigma^M = \sigma^*$  by transposing one adjacent pair at a time, such that all elements in the sequence remain in  $\Pi^*(\mathbf{p})$ , and the final permutation  $\sigma^M$  is also in  $\Pi(\mathbf{p})$ .

Let  $\sigma^0 \in \Pi^*(\mathbf{p})$ . If  $\sigma^0 \in \Pi(\mathbf{p})$ , we are done, so let us assume  $\sigma^0 \notin \Pi(\mathbf{p})$ . Thus there must exist an adjacent pair of elements in  $\sigma$  that are not ordered according to the scores  $u_{ii}^\mathbf{p}$ , i.e. there must exist  $a, b, c \in [r]$  such that

$$\sigma^0(a) = c, \quad \sigma^0(b) = c+1, \quad \text{and} \quad u_{aa}^\mathbf{p} < u_{bb}^\mathbf{p}.$$

Define  $\sigma^1$  to be such that  $\sigma^1(a) = c+1, \sigma^1(b) = c$ , and  $\sigma^1(i) = \sigma^0(i)$  for all other  $i \in [r]$ . We will show that  $\sigma^1 \in \Pi^*(\mathbf{p})$ . For convenience let us denote  $(\sigma^0)^{-1}$  as  $\pi^0$  and  $(\sigma^1)^{-1}$  as  $\pi^1$ . Note that

$$\begin{aligned} \pi^0(c) &= \pi^1(c+1) = a \\ \pi^0(c+1) &= \pi^1(c) = b \\ \pi^0(i) &= \pi^1(i) \quad \forall i \in [r] \setminus \{c, c+1\}. \end{aligned}$$

From the expression for  $\mathbf{p}^\top \ell_\sigma$  in Eq. (2) in the proof of Theorem 4 above, we have

$$\begin{aligned} \mathbf{p}^\top \ell_{\sigma^0} - \mathbf{p}^\top \ell_{\sigma^1} &= \frac{1}{c} \left( \sum_{j=1}^c (u_{\pi^1(c)\pi^1(j)}^\mathbf{p} - u_{\pi^0(c)\pi^0(j)}^\mathbf{p}) \right) + \frac{1}{c+1} \left( \sum_{j=1}^{c+1} (u_{\pi^1(c+1)\pi^1(j)}^\mathbf{p} - u_{\pi^0(c+1)\pi^0(j)}^\mathbf{p}) \right) \\ &= \frac{1}{c} \left( \sum_{j=1}^c (u_{b\pi^1(j)}^\mathbf{p} - u_{a\pi^0(j)}^\mathbf{p}) \right) + \frac{1}{c+1} \left( \sum_{j=1}^{c+1} (u_{a\pi^1(j)}^\mathbf{p} - u_{b\pi^0(j)}^\mathbf{p}) \right) \\ &= \left( \frac{1}{c} - \frac{1}{c+1} \right) \sum_{j=1}^{c-1} (u_{b\pi^1(j)}^\mathbf{p} - u_{a\pi^1(j)}^\mathbf{p}) + \frac{1}{c} (u_{bb}^\mathbf{p} - u_{aa}^\mathbf{p}) + \frac{1}{c+1} (u_{ab}^\mathbf{p} + u_{aa}^\mathbf{p} - u_{ba}^\mathbf{p} - u_{bb}^\mathbf{p}) \\ &= \left( \frac{1}{c} - \frac{1}{c+1} \right) \left( \sum_{j=1}^{c-1} (u_{b\pi^1(j)}^\mathbf{p} - u_{a\pi^1(j)}^\mathbf{p}) + u_{bb}^\mathbf{p} - u_{aa}^\mathbf{p} \right) \\ &= \left( \frac{1}{c} - \frac{1}{c+1} \right) \left( u_{bb}^\mathbf{p} - \left( u_{aa}^\mathbf{p} + \sum_{j=1}^{c-1} (u_{a\pi^1(j)}^\mathbf{p} - u_{b\pi^1(j)}^\mathbf{p}) \right) \right) \\ &\geq \left( \frac{1}{c} - \frac{1}{c+1} \right) \left( u_{bb}^\mathbf{p} - \left( u_{aa}^\mathbf{p} + \sum_{j \in [r], j \notin \{c, c+1\}} (u_{a\pi^1(j)}^\mathbf{p} - u_{b\pi^1(j)}^\mathbf{p}) \right) \right) \\ &\geq 0, \end{aligned}$$

where the last inequality follows since  $\mathbf{p} \in \mathcal{P}_{\text{reinforce}}$ . This gives  $\sigma^1 \in \Pi^*(\mathbf{p})$ . Moreover, the number of adjacent pairs in  $\sigma^1$  that disagree with the ordering according to  $u_{ii}^\mathbf{p}$  is one less than that in  $\sigma^0$ . Since there can be at most  $\binom{r}{2}$  such pairs in  $\sigma^0$  to start with, by repeating the above process, we will eventually end up with a permutation  $\sigma^M \in \Pi(\mathbf{p}) \cap \Pi^*(\mathbf{p})$  (with  $M \leq \binom{r}{2}$ ). The claim follows.  $\square$

### Proof of Theorem 6

*Proof.* Let  $\mathbf{p} \in \mathcal{P}_{\mathbf{f}}$ . Define  $\mathbf{u}^{\mathbf{p}} \in \mathbb{R}^r$  as

$$\mathbf{u}^{\mathbf{p}} = \mathbf{E}_{Y \sim \mathbf{p}}[\mathbf{f}(Y)] = \sum_{\mathbf{y} \in \mathcal{Y}} p_{\mathbf{y}} \mathbf{f}(\mathbf{y}).$$

It is easy to see that  $\mathbf{u}^{\mathbf{p}}$  is the unique minimizer of  $\mathbf{p}^{\top} \psi_{\mathbf{f}}(\mathbf{u})$  over  $\mathbf{u} \in \mathbb{R}^r$ .

Also define  $\mathbf{y}^{\mathbf{p}} \in \mathbb{R}^{r(r-1)}$  as

$$y_{ij}^{\mathbf{p}} = \mathbf{E}_{Y \sim \mathbf{p}}[Y_{ij}] = \sum_{\mathbf{y} \in \mathcal{Y}} p_{\mathbf{y}} y_{ij} \quad \forall i \neq j.$$

For brevity, we will write  $\ell_{\text{PD}}$  as  $\ell$  below. Define the following sets:

$$\Pi^*(\mathbf{p}) = \operatorname{argmin}_{\sigma \in S_r} \mathbf{p}^{\top} \ell_{\sigma} = \operatorname{argmin}_{\sigma \in S_r} \sum_{i=1}^r \sum_{j=1}^{i-1} (y_{ij}^{\mathbf{p}} - y_{ji}^{\mathbf{p}}) \cdot \mathbf{1}(\sigma(i) > \sigma(j))$$

$$\Pi(\mathbf{p}) = \left\{ \sigma \in S_r : u_i^{\mathbf{p}} > u_j^{\mathbf{p}} \implies \sigma(i) < \sigma(j) \right\}.$$

We claim that  $\Pi(\mathbf{p}) \subseteq \Pi^*(\mathbf{p})$ . To see this, let  $\sigma \in \Pi(\mathbf{p})$ . Since  $\mathbf{p} \in \mathcal{P}_{\mathbf{f}}$ , we have

$$y_{ij}^{\mathbf{p}} > y_{ji}^{\mathbf{p}} \implies u_i^{\mathbf{p}} > u_j^{\mathbf{p}} \implies \sigma(i) < \sigma(j),$$

$$y_{ij}^{\mathbf{p}} < y_{ji}^{\mathbf{p}} \implies u_i^{\mathbf{p}} < u_j^{\mathbf{p}} \implies \sigma(i) > \sigma(j).$$

This clearly gives  $\sigma \in \Pi^*(\mathbf{p})$ . Thus  $\Pi(\mathbf{p}) \subseteq \Pi^*(\mathbf{p})$ .

By the definition of  $\text{pred}$  and  $\Pi(\mathbf{p})$ , we also have that  $\exists \epsilon > 0$  such that for any  $\mathbf{u} \in \mathbb{R}^r$ ,

$$\|\mathbf{u} - \mathbf{u}^{\mathbf{p}}\| < \epsilon \implies \text{pred}(\mathbf{u}) \in \Pi(\mathbf{p}).$$

Thus, we have

$$\begin{aligned} \inf_{\mathbf{u} \in \mathbb{R}^r : \text{pred}(\mathbf{u}) \notin \operatorname{argmin}_{\sigma} \mathbf{p}^{\top} \ell_{\sigma}} \mathbf{p}^{\top} \psi_{\mathbf{f}}(\mathbf{u}) &= \inf_{\mathbf{u} \in \mathbb{R}^r : \text{pred}(\mathbf{u}) \notin \Pi^*(\mathbf{p})} \mathbf{p}^{\top} \psi_{\mathbf{f}}(\mathbf{u}) \\ &\geq \inf_{\mathbf{u} \in \mathbb{R}^r : \text{pred}(\mathbf{u}) \notin \Pi(\mathbf{p})} \mathbf{p}^{\top} \psi_{\mathbf{f}}(\mathbf{u}) \\ &\geq \inf_{\mathbf{u} \in \mathbb{R}^r : \|\mathbf{u} - \mathbf{u}^{\mathbf{p}}\| \geq \epsilon} \mathbf{p}^{\top} \psi_{\mathbf{f}}(\mathbf{u}) \\ &> \inf_{\mathbf{u} \in \mathbb{R}^r} \mathbf{p}^{\top} \psi_{\mathbf{f}}(\mathbf{u}), \end{aligned}$$

where the last inequality follows since  $\mathbf{p}^{\top} \psi_{\mathbf{f}}(\mathbf{u})$  is a strictly convex function of  $\mathbf{u}$  and  $\mathbf{u}^{\mathbf{p}}$  is its unique minimizer.

Since the above holds for all  $\mathbf{p} \in \mathcal{P}_{\mathbf{f}}$ , we have that  $(\psi_{\mathbf{f}}, \text{pred})$  is  $(\ell_{\text{PD}}, \mathcal{P}_{\mathbf{f}})$ -calibrated.  $\square$

### Proof of Theorem 7

*Proof.* Let  $\mathbf{p} \in \mathcal{P}_{\text{DAG}}$ . Define  $\mathbf{u}^{\mathbf{p}} \in \mathbb{R}^{r(r-1)}$  as

$$\mathbf{u}^{\mathbf{p}} = \mathbf{E}_{Y \sim \mathbf{p}}[Y_{ij}] = \sum_{\mathbf{y} \in \mathcal{Y}} p_{\mathbf{y}} y_{ij}.$$

It is easy to see that  $\mathbf{u}^{\mathbf{p}}$  is the unique minimizer of  $\mathbf{p}^{\top} \psi_{\text{PD}}^*(\mathbf{u})$  over  $\mathbf{u} \in \mathbb{R}^{r(r-1)}$ .

For brevity, we will write  $\ell_{\text{PD}}$  as  $\ell$  below. Define the following sets:

$$\Pi^*(\mathbf{p}) = \operatorname{argmin}_{\sigma \in S_r} \mathbf{p}^{\top} \ell_{\sigma} = \operatorname{argmin}_{\sigma \in S_r} \sum_{i=1}^r \sum_{j=1}^{i-1} (u_{ij}^{\mathbf{p}} - u_{ji}^{\mathbf{p}}) \cdot \mathbf{1}(\sigma(i) > \sigma(j))$$

$$\Pi(\mathbf{p}) = \left\{ \sigma \in S_r : \sigma \text{ corresponds to a topological order that could be returned by } \overline{\text{pred}}_{\text{PD}}(\mathbf{u}^{\mathbf{p}}) \right\}.$$

We claim that  $\Pi(\mathbf{p}) \subseteq \Pi^*(\mathbf{p})$ . To see this, let  $\sigma \in \Pi(\mathbf{p})$ . Since  $\mathbf{p} \in \mathcal{P}_{\text{DAG}}$ , we have that the graph with edge weights  $(u_{ij}^{\mathbf{p}} - u_{ji}^{\mathbf{p}})_+$  formed by  $\text{pred}(\mathbf{u}^{\mathbf{p}})$  is a DAG, and therefore  $\sigma$  must agree with the edges in this graph, i.e.

$$\begin{aligned} u_{ij}^{\mathbf{p}} > u_{ji}^{\mathbf{p}} &\implies \sigma(i) < \sigma(j), \\ u_{ij}^{\mathbf{p}} < u_{ji}^{\mathbf{p}} &\implies \sigma(i) > \sigma(j). \end{aligned}$$

This clearly gives  $\sigma \in \Pi^*(\mathbf{p})$ . Thus  $\Pi(\mathbf{p}) \subseteq \Pi^*(\mathbf{p})$ .

Now, let

$$A(\mathbf{p}) = \{\mathbf{u} \in \mathbb{R}^{r(r-1)} : \overline{\text{pred}}_{\text{PD}}(\mathbf{u}) \notin \arg\min_{\sigma} \mathbf{p}^{\top} \ell_{\sigma}\} = \{\mathbf{u} \in \mathbb{R}^{r(r-1)} : \overline{\text{pred}}_{\text{PD}}(\mathbf{u}) \notin \Pi^*(\mathbf{p})\}.$$

In order to show that

$$\inf_{\mathbf{u} \in A(\mathbf{p})} \mathbf{p}^{\top} \psi_{\text{PD}}^*(\mathbf{u}) > \inf_{\mathbf{u} \in \mathbb{R}^r} \mathbf{p}^{\top} \psi_{\text{PD}}^*(\mathbf{u}),$$

we will show that any sequence  $\{\mathbf{u}_m\}$  in  $\mathbb{R}^{r(r-1)}$  converging to  $\mathbf{u}^{\mathbf{p}}$  must eventually lie outside  $A(\mathbf{p})$ , i.e. that any such sequence must eventually have  $\overline{\text{pred}}_{\text{PD}}(\mathbf{u}_m) \in \Pi^*(\mathbf{p})$ ; the result will then follow by strict convexity of the function  $\mathbf{u} \mapsto \mathbf{p}^{\top} \psi_{\text{PD}}^*(\mathbf{u})$  and the fact that  $\mathbf{u}^{\mathbf{p}}$  is its unique minimizer.

Let  $\{\mathbf{u}_m\}$  be any sequence in  $\mathbb{R}^{r(r-1)}$  converging to  $\mathbf{u}^{\mathbf{p}}$ . Let

$$\epsilon = \min_{i \neq j} \{u_{ij}^{\mathbf{p}} - u_{ji}^{\mathbf{p}} : u_{ij}^{\mathbf{p}} - u_{ji}^{\mathbf{p}} > 0\}.$$

Then for large enough  $m$ , we must have the following (by convergence of  $\{\mathbf{u}_m\}$  to  $\mathbf{u}^{\mathbf{p}}$ ):

$$\begin{aligned} u_{ij}^{\mathbf{p}} - u_{ji}^{\mathbf{p}} > 0 &\implies u_{ij}^m - u_{ji}^m \geq \epsilon/2, \\ u_{ij}^{\mathbf{p}} - u_{ji}^{\mathbf{p}} = 0 &\implies u_{ij}^m - u_{ji}^m \leq \epsilon/4. \end{aligned}$$

Thus, for large enough  $m$ , the directed graph induced by  $\mathbf{u}_m$  contains the DAG induced by  $\mathbf{u}^{\mathbf{p}}$ , and any edge  $(i, j)$  such that  $u_{ij}^{\mathbf{p}} - u_{ji}^{\mathbf{p}} > 0$  will not be deleted by the algorithm when  $\overline{\text{pred}}_{\text{PD}}(\mathbf{u}_m)$  is evaluated. Thus, for large enough  $m$ , we have  $\overline{\text{pred}}_{\text{PD}}(\mathbf{u}_m) \in \Pi(\mathbf{p}) \subseteq \Pi^*(\mathbf{p})$ .

Since the above holds for all  $\mathbf{p} \in \mathcal{P}_{\text{DAG}}$ , we have that  $(\psi_{\text{PD}}^*, \overline{\text{pred}}_{\text{PD}})$  is  $(\ell_{\text{PD}}, \mathcal{P}_{\text{DAG}})$ -calibrated.  $\square$
